# Supplementary material for: One-dimensional semimetal contacts to two-dimensional semiconductors
Source: Springer Nature journal article supplement (doi:10.1038/s41467-022-35760-x), 2023-01-07
Supplement: 41467_2022_35760_MOESM3_ESM.pdf [file 41467_2022_35760_MOESM3_ESM.pdf]

### **Description of Additional Supplementary Files**

File Name: Supplementary Movie 1

Description: The Supplementary Movie 1 shows that the entire individual ultralong CNT on Si substrate can be efficiently tracked with the optical microscope.
